# Supplementary material for: Lanthanide(iii) complexes of aminoethyl-DO3A as PARACEST contrast agents based on decoordination of the weakly bound amino group
Source: Royal Society of Chemistry journal article supplement (doi:10.1039/c3dt52031e), 2013-01-01
Supplement: c3dt52031e.pdf [file c3dt52031e.pdf]

## Electronic supplementary information (ESI)

for

# Lanthanide(III) complexes of aminoethyl-DO3A as PARACEST contrast agents based on decoordination of the weakly bound amino group

Tereza Krchová,<sup>a</sup> Jan Kotek,<sup>a\*</sup> Daniel Jiráček,<sup>b</sup> Jana Havlíčková,<sup>a</sup> Ivana Císařová,<sup>a</sup> Petr Hermann<sup>a</sup>

<sup>a</sup> Department of Inorganic Chemistry, Universita Karlova (Charles University), Hlavova 2030, 128 40 Prague 2, Czech Republic. Tel: +420-22195-1261. Fax: +420-22195-1253. E-mail: [modrej@natur.cuni.cz](mailto:modrej@natur.cuni.cz).

<sup>b</sup> Department of Radiodiagnostic and Interventional Radiology, Magnetic Resonance Unit, Institute of Clinical and Experimental Medicine, Vídeňská 1958/9, 140 21 Prague 4, Czech Republic.

## Content:

|                                                                                                                                                                     | Page |
|---------------------------------------------------------------------------------------------------------------------------------------------------------------------|------|
| <b>Fig. S1</b> Molecular structure of $H_3L^2$ found in the crystal structure of $H_3L^2 \cdot 6H_2O$ .                                                             | 2    |
| <b>Fig. S2</b> Molecular structure of $H_3L^3$ found in the crystal structure of $H_3L^3 \cdot 3.5H_2O$ .                                                           | 2    |
| <b>Table S1</b> Torsion angles in the macrocyclic units found in the crystal structures of $H_3L^1 \cdot 5H_2O$ , $H_3L^2 \cdot 6H_2O$ and $H_3L^3 \cdot 3.5H_2O$ . | 3    |
| <b>Fig. S3</b> The distribution diagram of $H_3L^1$ .                                                                                                               | 3    |
| <b>Fig. S4</b> $^1H$ NMR chemical shifts dependence of $H_3L^1$ on pH.                                                                                              | 4    |
| <b>Scheme S1</b> Protonation scheme of $H_3L^1$ .                                                                                                                   | 4    |
| <b>Fig. S5</b> Distribution diagram of the $La^{3+}:H_3L^1$ system.                                                                                                 | 5    |
| <b>Fig. S6</b> Distribution diagram of the $Gd^{3+}:H_3L^1$ system.                                                                                                 | 5    |
| <b>Fig. S7</b> $^1H$ NMR spectra of $[Eu(H_2O)(L^1)]$ at different temperatures.                                                                                    | 6    |
| <b>Fig. S8</b> $^1H$ NMR spectra of $[Yb(L^1)]$ at different temperatures.                                                                                          | 7    |
| <b>Fig. S9</b> Disorder of the $[Yb(L^1)]$ molecule found in the solid-state structure of $[Yb(L^1)] \cdot 5H_2O$ .                                                 | 8    |
| <b>Table S2</b> Selected geometric parameters found in the structure of $[Yb(L^1)] \cdot 5H_2O$ .                                                                   | 8    |
| <b>Fig. S10</b> $^1H$ NMR spectra of $[Eu(H_2O)(L^1)]$ in $H_2O$ , in $H_2O$ with presaturation of the bulk water signal and in $D_2O$ .                            | 9    |
| <b>Fig. S11</b> Z-spectra of aq. solution of $[Eu(H_2O)(L^1)]$ and $[Yb(L^1)]$ complexes at different temperatures (85 °C, 95 °C).                                  | 10   |
| <b>Fig. S12</b> Z-spectra of aq. solution of $[Eu(H_2O)(L^2)]$ and $[Yb(L^2)]$ complexes at different pH and temperatures.                                          | 10   |
| <b>Fig. S13</b> Z-spectra of aq. solution of $[Eu(H_2O)(L^3)]$ and $[Yb(L^3)]$ complexes at different pH and temperatures.                                          | 11   |
| <b>Fig. S14</b> MRI-CEST images of phantoms containing aq. solutions of $[Eu(H_2O)(L^1)]$ and $[Yb(L^1)]$ with different concentrations.                            | 12   |
| <b>Fig. S15</b> pH dependence of normalized intensity of the CEST effect of phantoms containing aqueous solutions of $[Eu(H_2O)(L^1)]$ and $[Yb(L^1)]$ .            | 13   |
| <b>Fig. S16</b> Concentration dependence of normalized intensity of the CEST effect of phantoms containing aqueous solutions of $[Eu(H_2O)(L^1)]$ and $[Yb(L^1)]$ . | 13   |
| <b>Fig. S17</b> $^1H$ NMR spectrum of $H_3L^1$ .                                                                                                                    | 14   |
| <b>Fig. S18</b> $^{13}C\{^1H\}$ NMR spectrum of $H_3L^1$ .                                                                                                          | 14   |
| <b>Fig. S19</b> $^1H$ NMR spectrum of $H_3L^2$ .                                                                                                                    | 15   |
| <b>Fig. S20</b> $^{13}C\{^1H\}$ NMR spectrum of $H_3L^2$ .                                                                                                          | 15   |
| <b>Fig. S21</b> $^1H$ NMR spectrum of $H_3L^3$ .                                                                                                                    | 16   |
| <b>Fig. S22</b> $^{13}C\{^1H\}$ NMR spectrum of $H_3L^3$ .                                                                                                          | 16   |

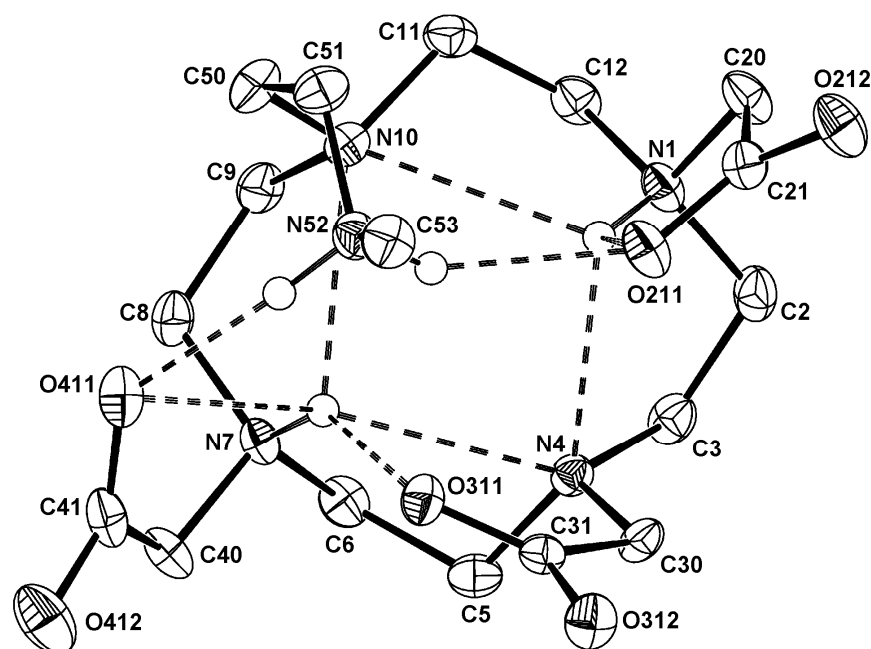

**Fig. S1** Molecular structure of  $\text{H}_3\text{L}^2$  found in the crystal structure of  $\text{H}_3\text{L}^2 \cdot 6\text{H}_2\text{O}$ . Dashed lines show system of intramolecular hydrogen bonds. Carbon-bound hydrogen atoms are omitted for sake of clarity.

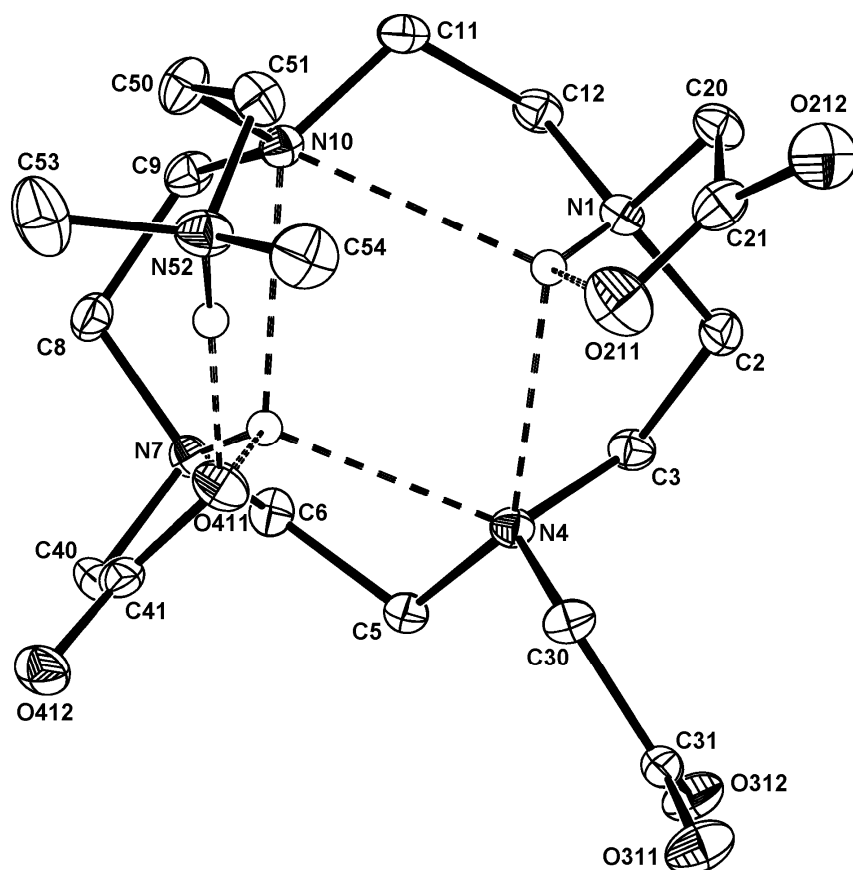

**Fig. S2** Molecular structure of  $\text{H}_3\text{L}^3$  found in the crystal structure of  $\text{H}_3\text{L}^3 \cdot 3.5\text{H}_2\text{O}$ . Dashed lines show system of intramolecular hydrogen bonds. Carbon-bound hydrogen atoms are omitted for sake of clarity.

**Table S1** Torsion angles in the macrocyclic units found in the crystal structures of  $\text{H}_3\text{L}^1 \cdot 5\text{H}_2\text{O}$ ,  $\text{H}_3\text{L}^2 \cdot 6\text{H}_2\text{O}$  and  $\text{H}_3\text{L}^3 \cdot 3.5\text{H}_2\text{O}$ .

| Torsion angle, ° | $\text{H}_3\text{L}^1$ | $\text{H}_3\text{L}^2$ | $\text{H}_3\text{L}^3$ |
|------------------|------------------------|------------------------|------------------------|
| N1-C2-C3-N4      | -49.71(13)             | -47.30(16)             | -53.54(13)             |
| C2-C3-N4-C5      | 170.56(10)             | 168.61(12)             | 166.59(9)              |
| C3-N4-C5-C6      | -88.19(11)             | -90.39(14)             | -90.36(11)             |
| N4-C5-C6-N7      | -63.19(12)             | -64.59(15)             | -58.02(12)             |
| C5-C6-N7-C8      | 153.42(10)             | 154.47(11)             | 159.90(9)              |
| C6-N7-C8-C9      | -73.43(12)             | -73.59(14)             | -76.06(12)             |
| N7-C8-C9-N10     | -58.24(13)             | -55.17(16)             | -58.50(13)             |
| C8-C9-N10-C11    | 167.89(10)             | 167.82(12)             | 163.69(9)              |
| C9-N10-C11-C12   | -78.57(12)             | -78.52(14)             | -80.67(11)             |
| N10-C11-C12-N1   | -62.61(12)             | -67.48(14)             | -68.79(12)             |
| C11-C12-N1-C2    | 159.05(9)              | 158.99(11)             | 160.83(9)              |
| C12-N1-C2-C3     | -76.48(12)             | -73.82(15)             | -66.10(12)             |

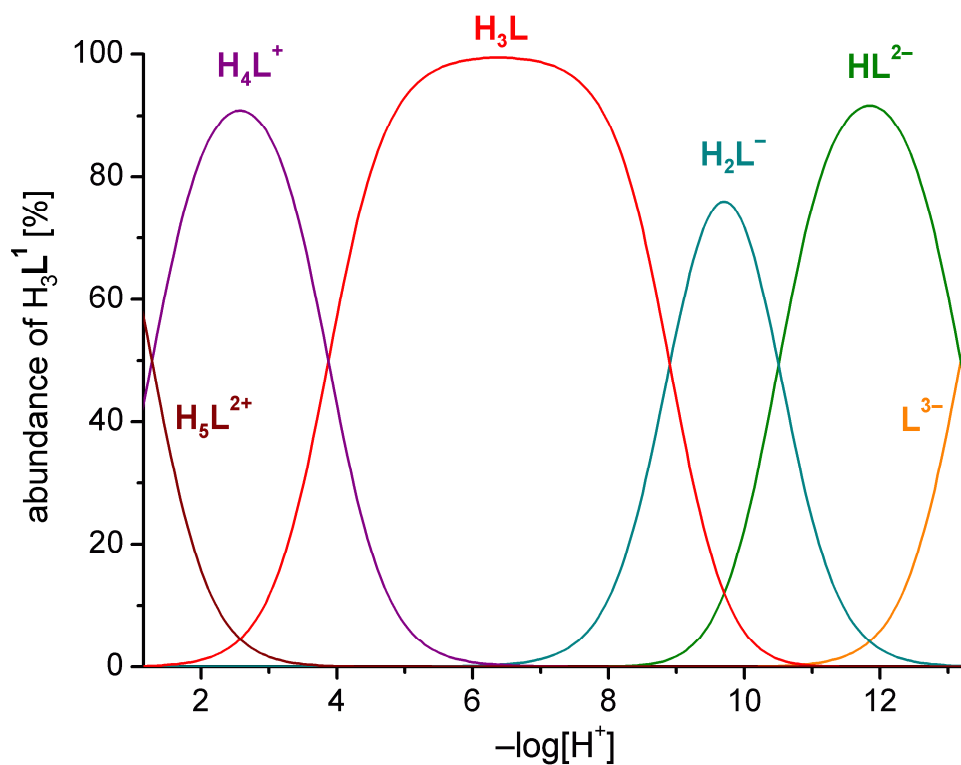

**Fig. S3** The distribution diagram of  $\text{H}_3\text{L}^1$ .

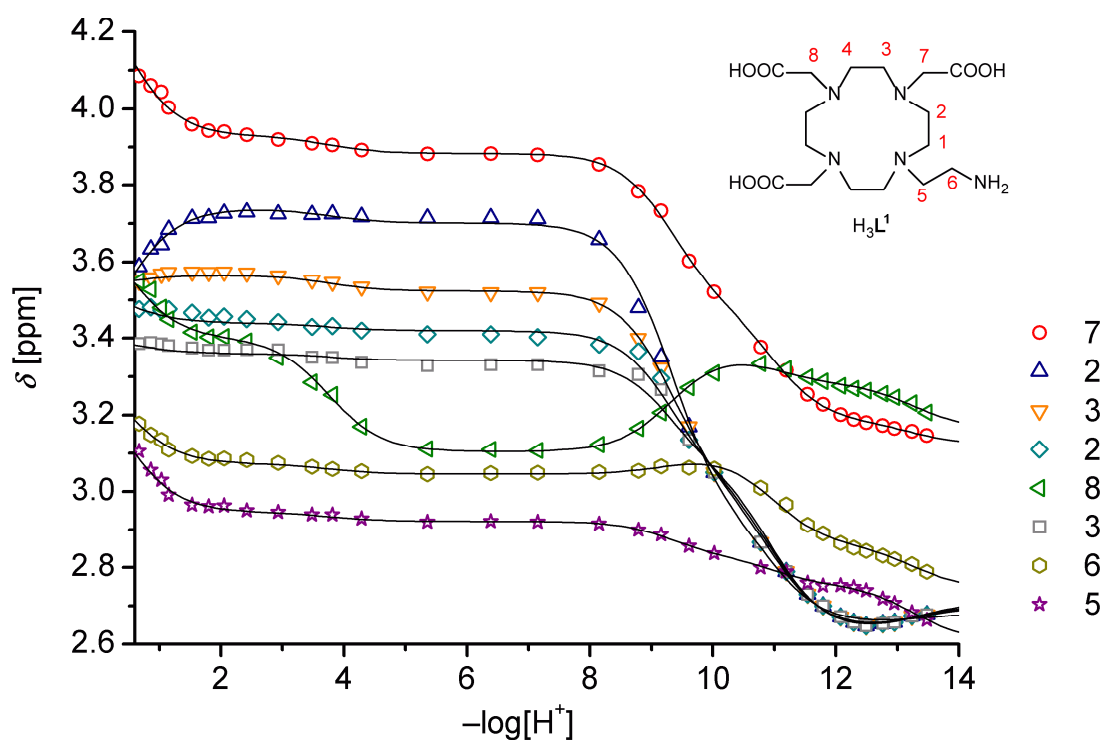

**Fig. S4** pH dependence of  $d_H$  of  $H_3L^1$  ( $B_0 = 14.1$  T,  $25^\circ\text{C}$ ). Dependence of chemical shifts of protons 1 and 4 were not included as they are overlapping with other signals. At pH below 9, individual protons of  $\text{CH}_2$  groups 2 and 3 became nonequivalent resulting in two signals for each of groups.

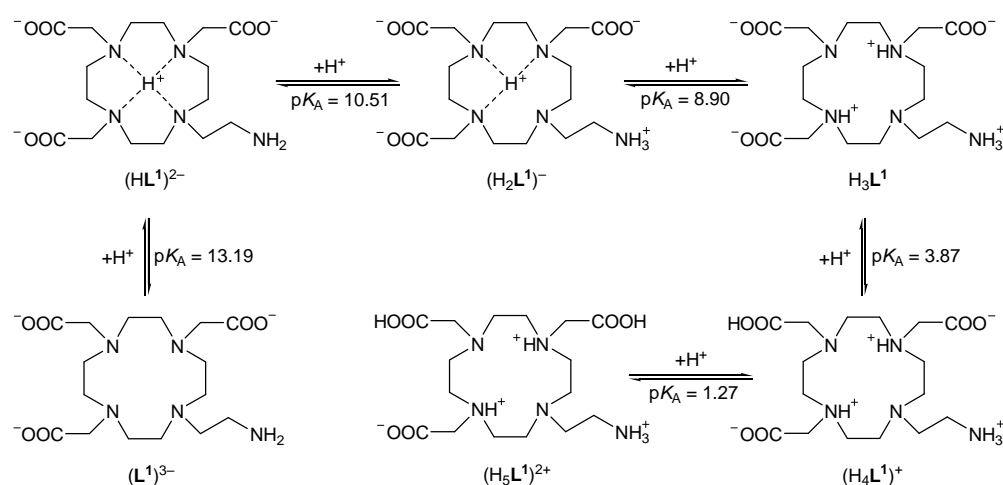

**Scheme S1** Consecutive protonation scheme of  $H_3L^1$ .

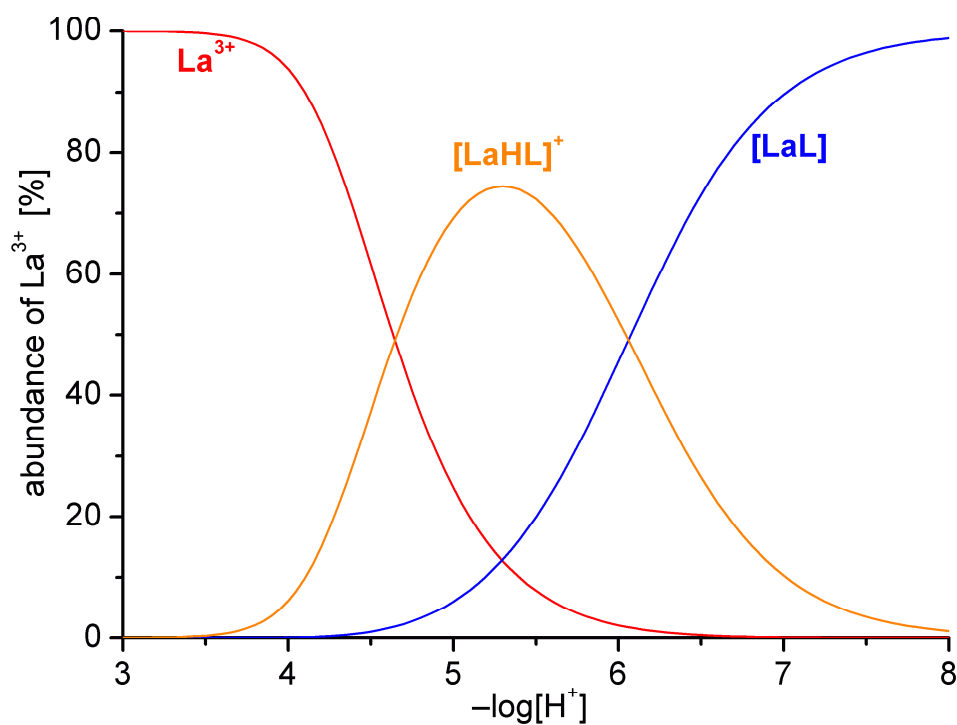

**Fig. S5** Distribution diagram of the  $\text{La}^{3+}:\text{H}_3\text{L}^1$  ( $c_{\text{M}} = c_{\text{L}} = 0.004 \text{ M}$ ) system ( $I = 0.1 \text{ M (NMe}_4\text{)Cl}$ ,  $25^\circ\text{C}$ ); determined by potentiometry,  $\text{L} = (\text{L}^1)^{3-}$ .

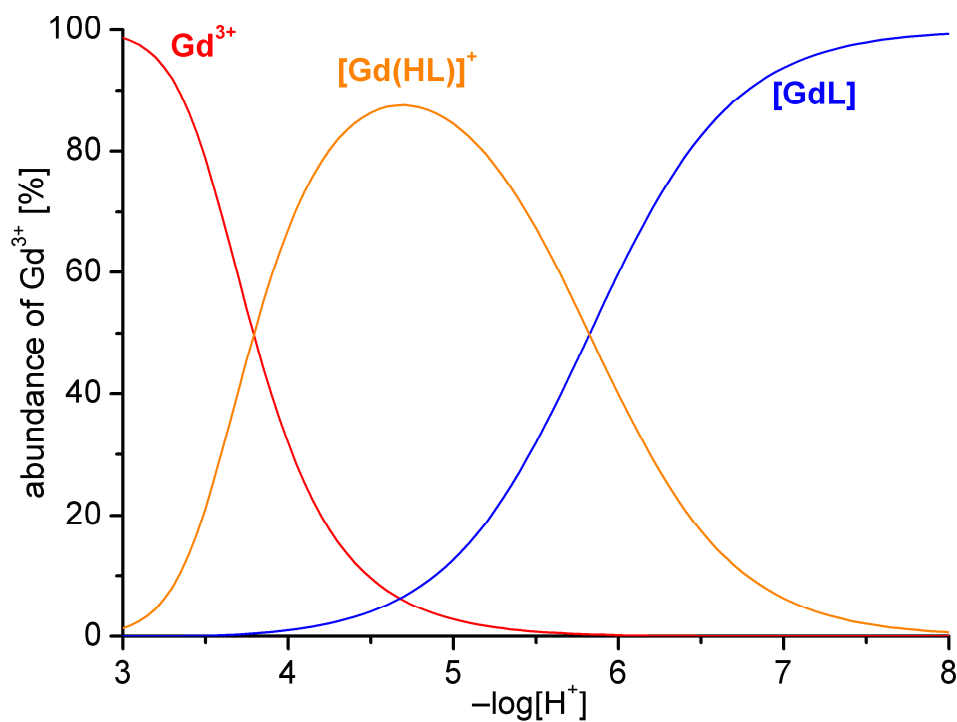

**Fig. S6** Distribution diagram of the  $\text{Gd}^{3+}:\text{H}_3\text{L}^1$  ( $c_{\text{M}} = c_{\text{L}} = 0.004 \text{ M}$ ) system ( $I = 0.1 \text{ M (NMe}_4\text{)Cl}$ ,  $25^\circ\text{C}$ ); determined by potentiometry,  $\text{L} = (\text{L}^1)^{3-}$ .

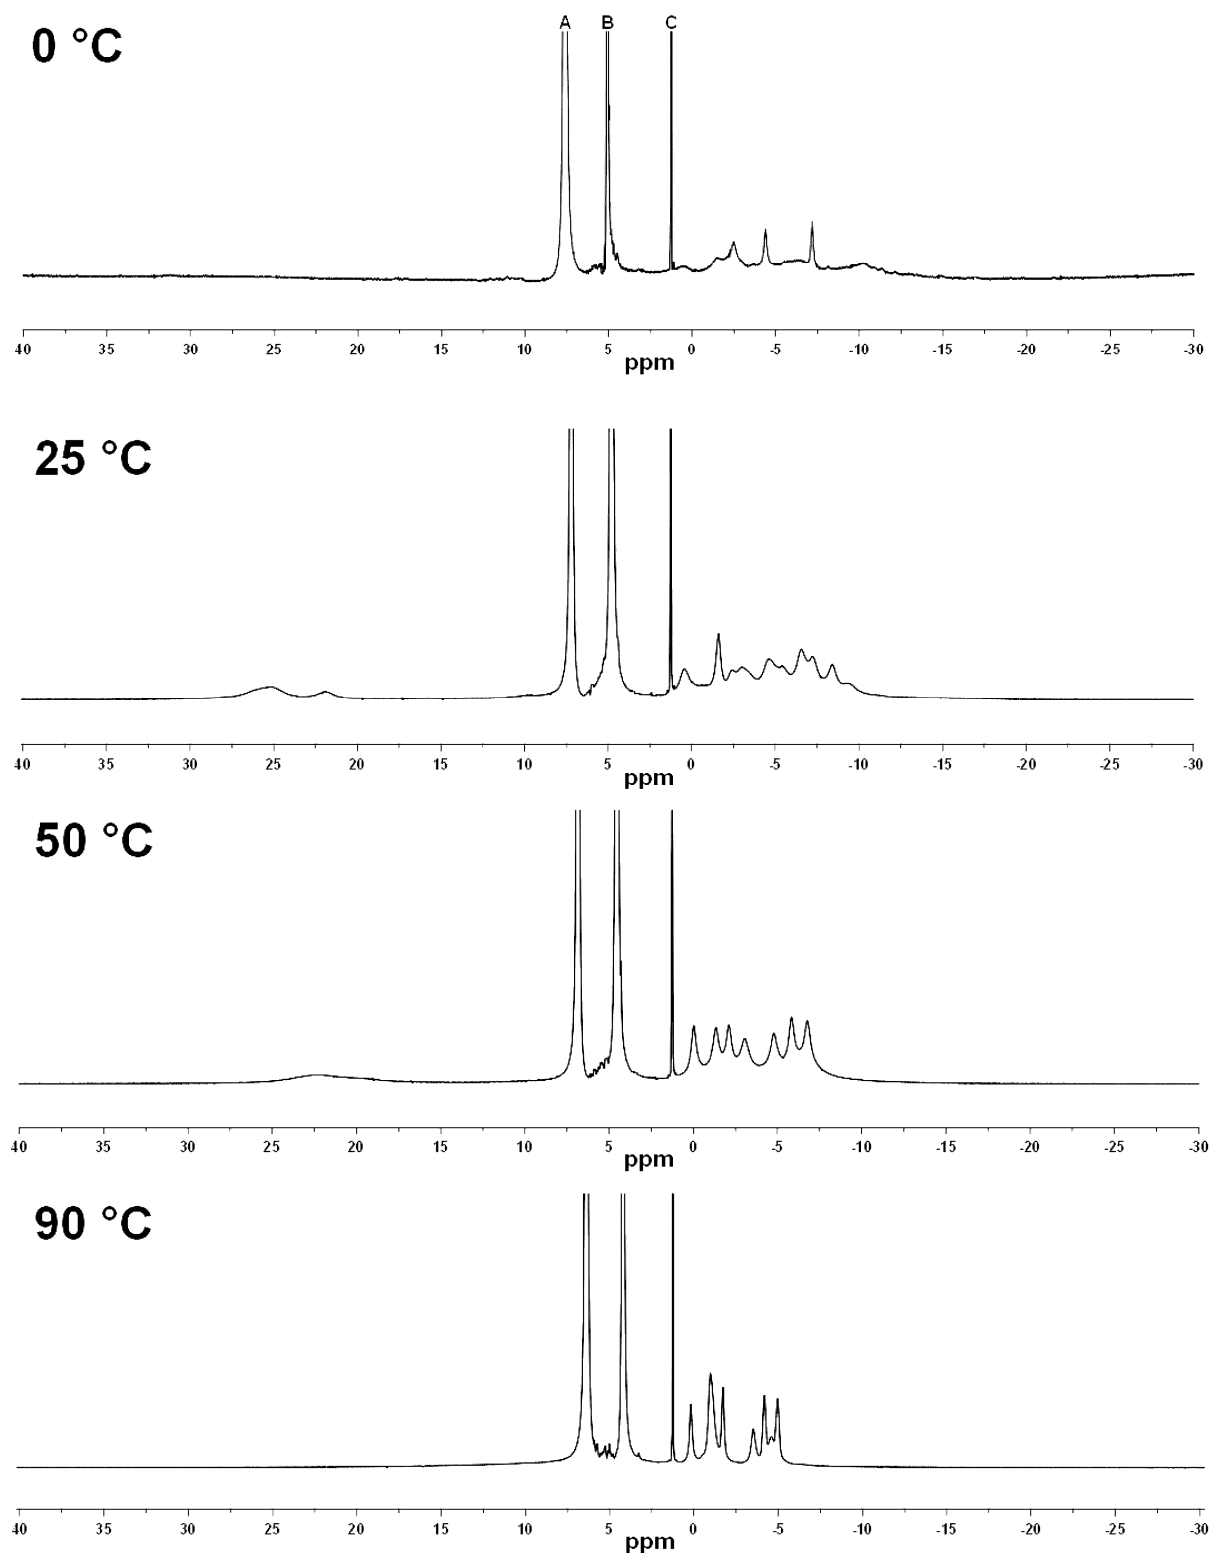

**Fig. S7**  $^1\text{H}$  NMR spectra of  $[\text{Eu}(\text{H}_2\text{O})(\text{L}^1)]$  (0.1 M solution in  $\text{D}_2\text{O}$ ,  $B_0 = 7.05$  T for 25, 50 and 90 °C and 9.4 T for 0 °C; pD = 9.0). A coaxial capillary with  $\text{D}_2\text{O}$  and  $t\text{-BuOH}$  was used as external standard ( $d_{\text{H}} = 1.25$  ppm). Signals assignment: A = HDO in sample solution, B = HDO in capillary, C =  $t\text{-BuOH}$  in capillary

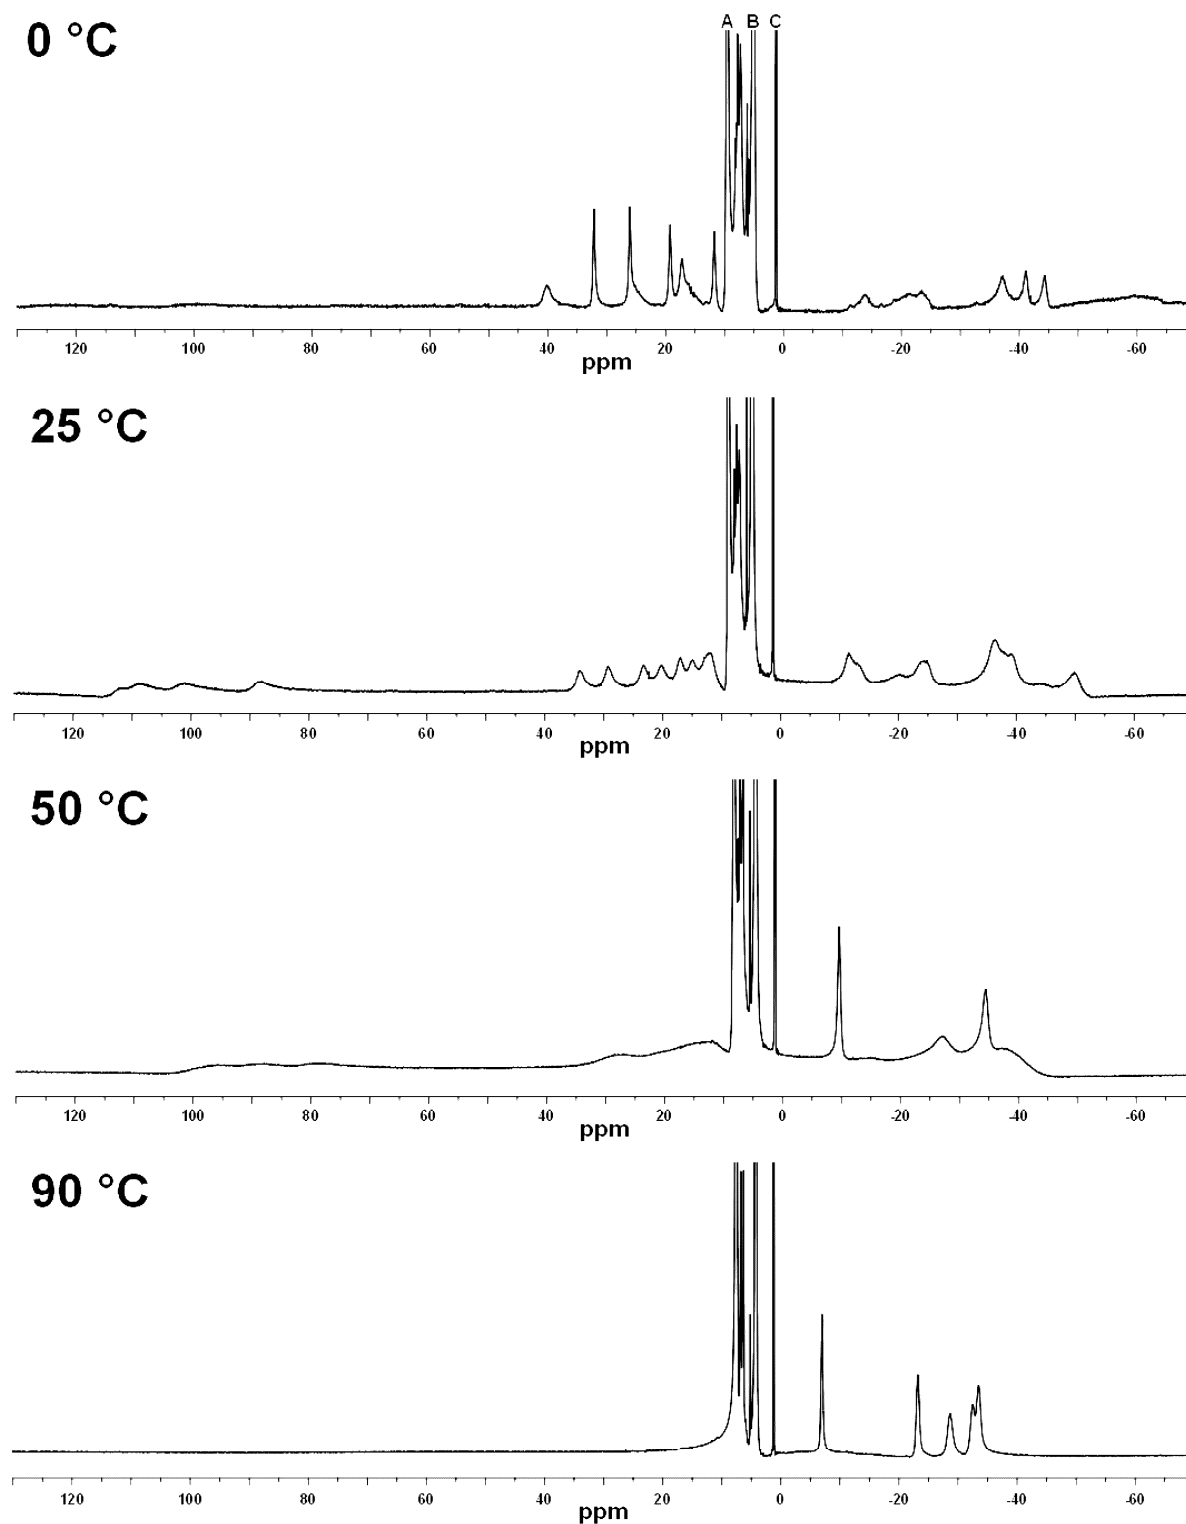

**Fig. S8**  $^1\text{H}$  NMR spectra of  $[\text{Yb}(\text{L}^1)]$  (0.1 M solution in  $\text{D}_2\text{O}$ ,  $B_0 = 7.05$  T for 25, 50 and 90 °C and 9.4 T for 0 °C; pD = 8.5). A coaxial capillary with  $\text{D}_2\text{O}$  and  $t\text{-BuOH}$  was used as external standard ( $d_{\text{H}} = 1.25$  ppm). Signals assignment: A = HDO in sample solution, B = HDO in capillary, C =  $t\text{-BuOH}$  in capillary.

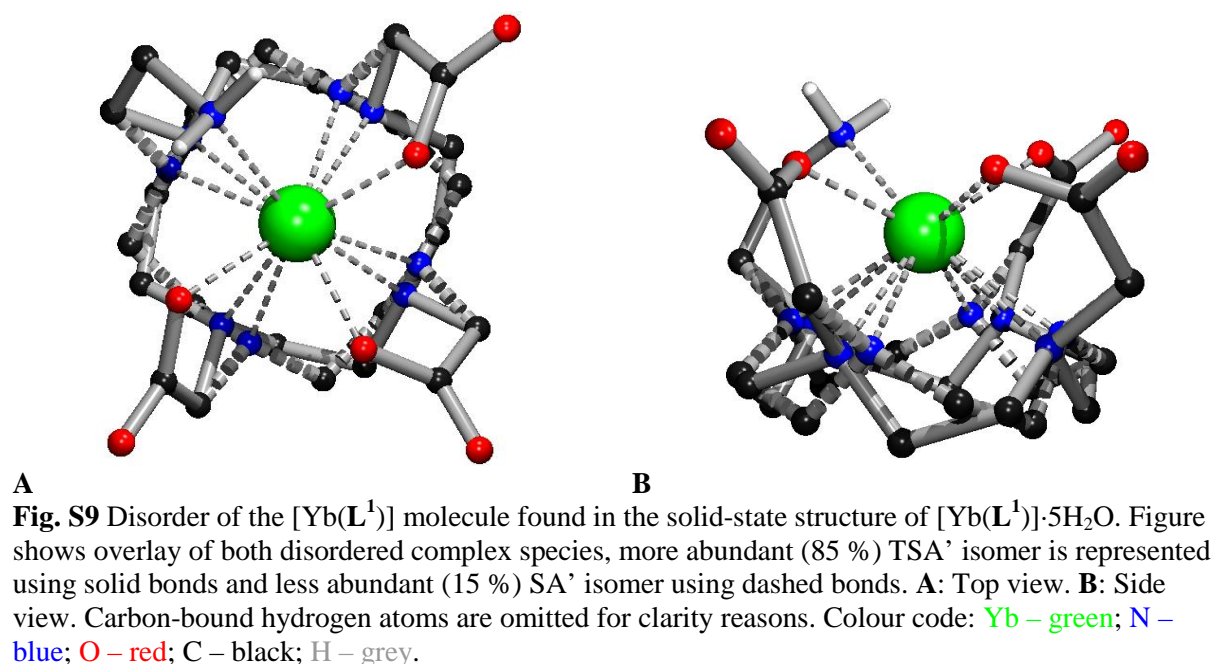

**Table S2** Geometric parameters of coordination sphere of  $\text{Yb}^{3+}$  ion in the crystal structure of  $[\text{Yb}(\text{L}^1)] \cdot 5\text{H}_2\text{O}$ .

| TSA'                              |            | SA'                                         |           |
|-----------------------------------|------------|---------------------------------------------|-----------|
| Coordination distances, Å         |            | Distances from planes, Å                    |           |
| N <sub>4</sub> plane of TSA' unit |            | NQA–OQ                                      |           |
| Yb1–N1A                           | 2.519(2)   | NQC–OQ                                      | 2.5919    |
| Yb1–N4A                           | 2.562(2)   | Yb1–NQA                                     | 2.5042    |
| Yb1–N7A                           | 2.516(2)   | Yb1–NQC                                     | 1.482(2)  |
| Yb1–N10A                          | 2.553(2)   | Yb1–OQ                                      | 1.396(2)  |
|                                   |            |                                             | 1.111(2)  |
| N <sub>4</sub> plane of SA' unit  |            | Dihedral angles of pendants in TSA' unit, ° |           |
| Yb1–N1C                           | 2.535(12)  | N1A–NQA–OQ–O211                             | –23.47(8) |
| Yb1–N4C                           | 2.466(13)  | N4A–NQA–OQ–O311                             | –23.90(8) |
| Yb1–N7C                           | 2.498(13)  | N7A–NQA–OQ–O411                             | –23.46(8) |
| Yb1–N10C                          | 2.525(12)  | N10A–NQA–OQ–N52                             | –19.15(8) |
| O <sub>3</sub> N plane            |            | Dihedral angles of pendants in SA' unit, °  |           |
| Yb1–O211                          | 2.2707(12) | N1C–NQC–OQ–O211                             | –38.5(4)  |
| Yb1–O311                          | 2.2564(12) | N4C–NQC–OQ–O311                             | –38.8(4)  |
| Yb1–O411                          | 2.2764(12) | N7C–NQC–OQ–O411                             | –38.8(4)  |
| Yb1–N52                           | 2.4485(15) | N10C–NQC–OQ–N52                             | –34.3(4)  |

NQA – the centroid of the N<sub>4</sub>-plane in TSA arrangement; NQC – the centroid of the N<sub>4</sub>-plane in SA arrangement; OQ – the centroid of the O<sub>3</sub>N-plane.

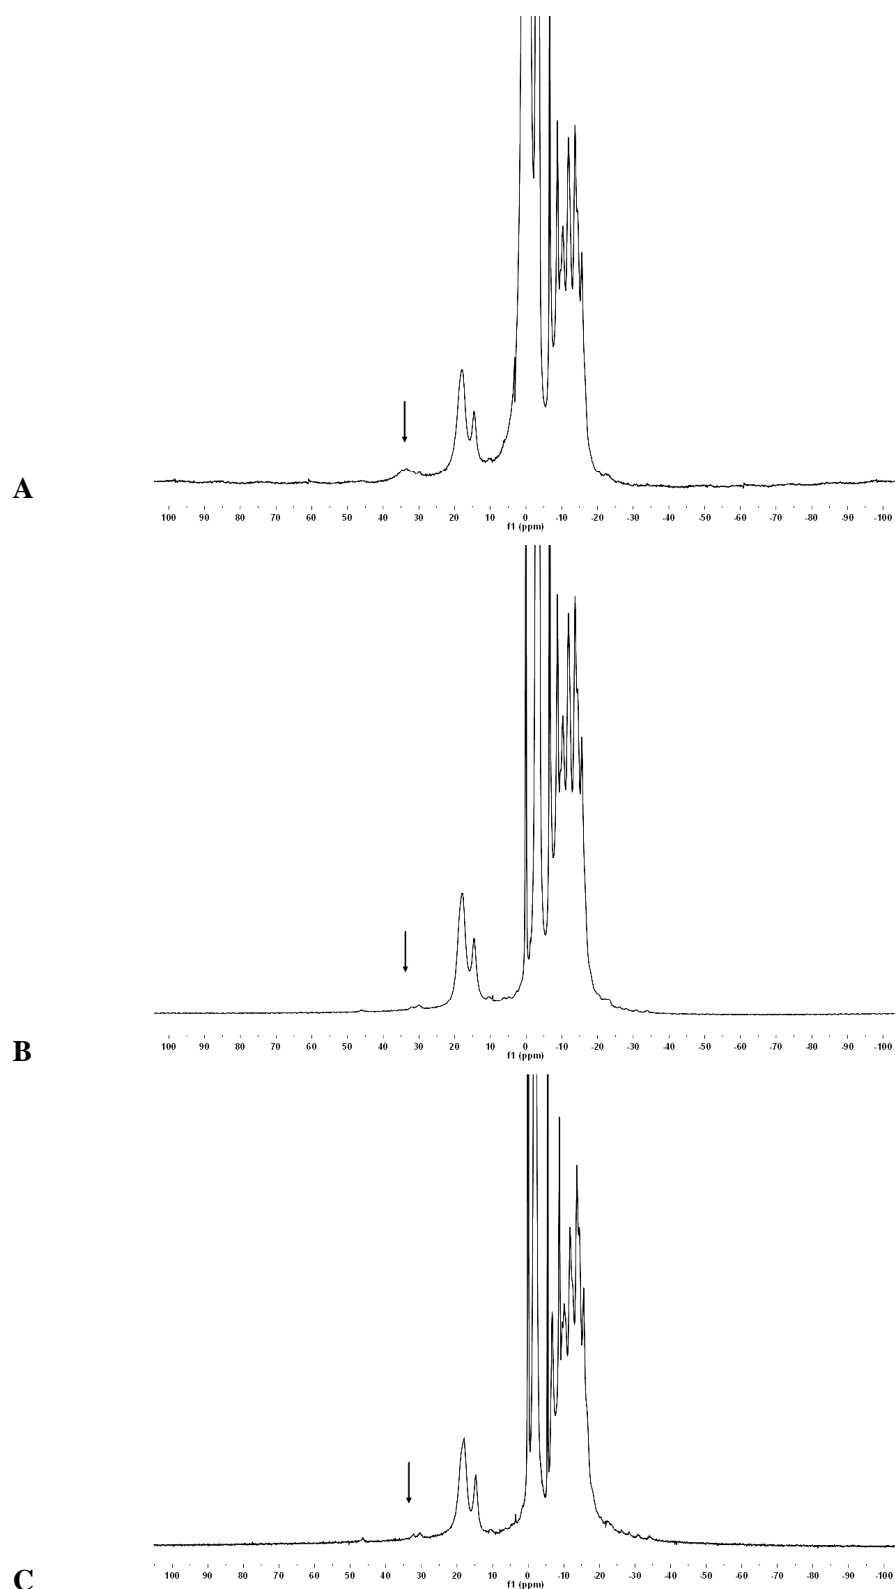

**Fig. S10** **A:**  $^1\text{H}$  NMR spectrum of  $[\text{Eu}(\text{H}_2\text{O})(\text{L}^1)]$  ( $\sim 1$  M solution in  $\text{H}_2\text{O}$ ,  $B_0 = 7.05$  T,  $25^\circ\text{C}$ ,  $\text{pH} = 7.9$ ). **B:**  $^1\text{H}$  NMR spectrum of  $[\text{Eu}(\text{H}_2\text{O})(\text{L}^1)]$  ( $\sim 1$  M solution in  $\text{H}_2\text{O}$ ,  $B_0 = 7.05$  T,  $25^\circ\text{C}$ ,  $\text{pH} = 7.9$ ); water signal was saturated. **C:**  $^1\text{H}$  NMR spectrum of  $[\text{Eu}(\text{H}_2\text{O})(\text{L}^1)]$  ( $\sim 1$  M solution in  $\text{D}_2\text{O}$ ,  $B_0 = 7.05$  T,  $25^\circ\text{C}$ ,  $\text{pD} = 7.9$ ). In all spectra, a coaxial capillary with  $\text{D}_2\text{O}$  and  $t\text{-BuOH}$  was used. Chemical shift of  $\text{H}_2\text{O}$  in solution was referenced to 0 ppm.

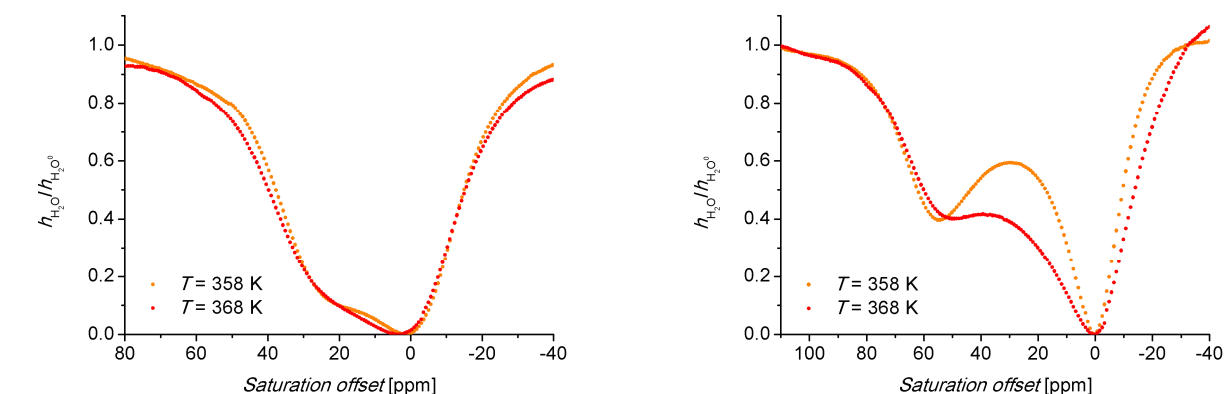

**Fig. S11** Z-spectra of 70 mM aq. solution of **A:**  $[Eu(H_2O)(L^1)]$  and **B:**  $[Yb(L^1)]$  complexes ( $B_0 = 7.05$  T, satpwr = 29 dB (~1000 Hz), satdly = 2 s) at pH = 7.40.

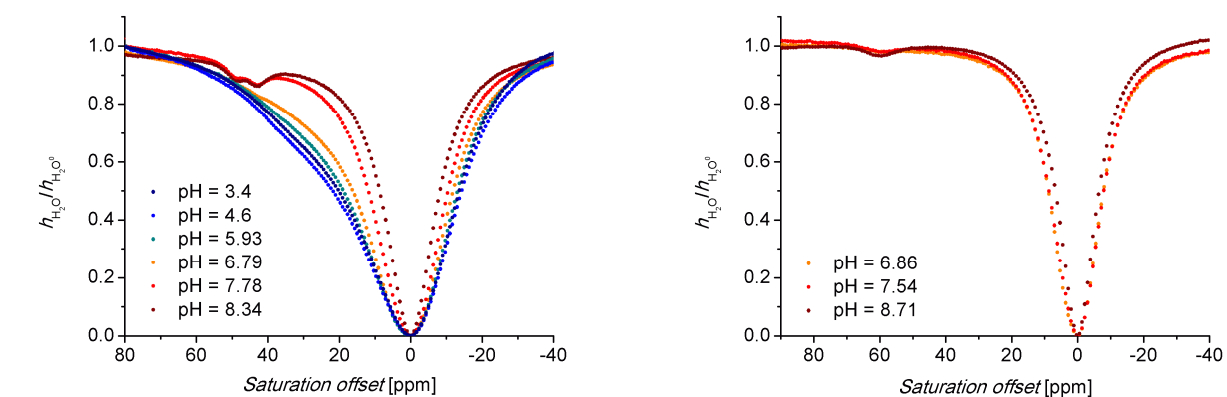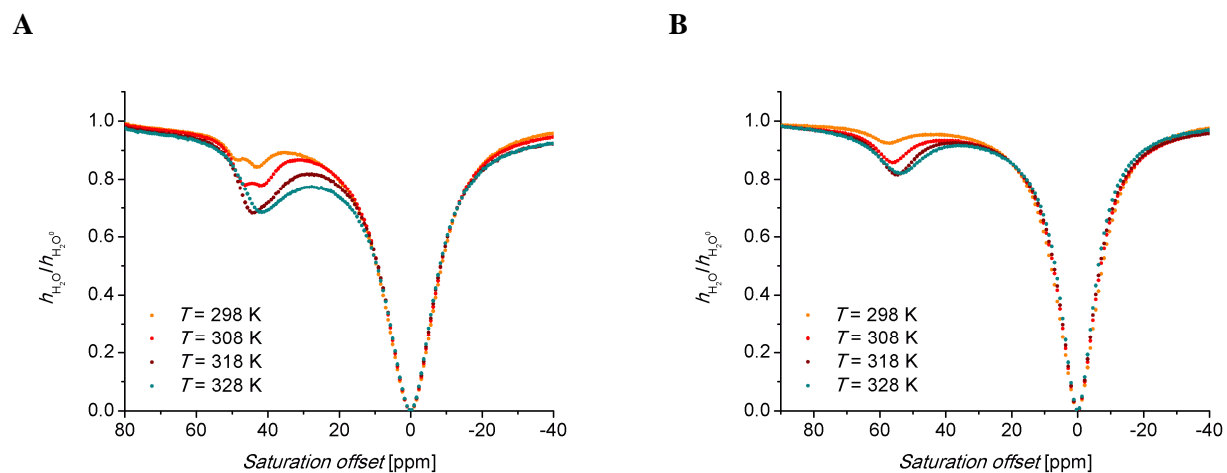

**Fig. S12** **A,C:** Z-spectra of a 25 mM aq. solution ( $H_2O/D_2O$  1:10) of  $[Eu(H_2O)(L^2)]$  complex ( $B_0 = 7.05$  T, satpwr = 29 dB~1000 Hz, satdly = 2 s). **A:**  $T = 298$  K. **C:** pH = 8.16. **B,D:** Z-spectra of a 25 mM (**B**) or 50 mM (**D**) aq. solution ( $H_2O/D_2O$  1:10) of  $[Yb(L^2)]$  complex ( $B_0 = 7.05$  T, satpwr = 29 dB~1000 Hz, satdly = 2 s). **B:**  $T = 298$  K. **D:** pH = 8.35.

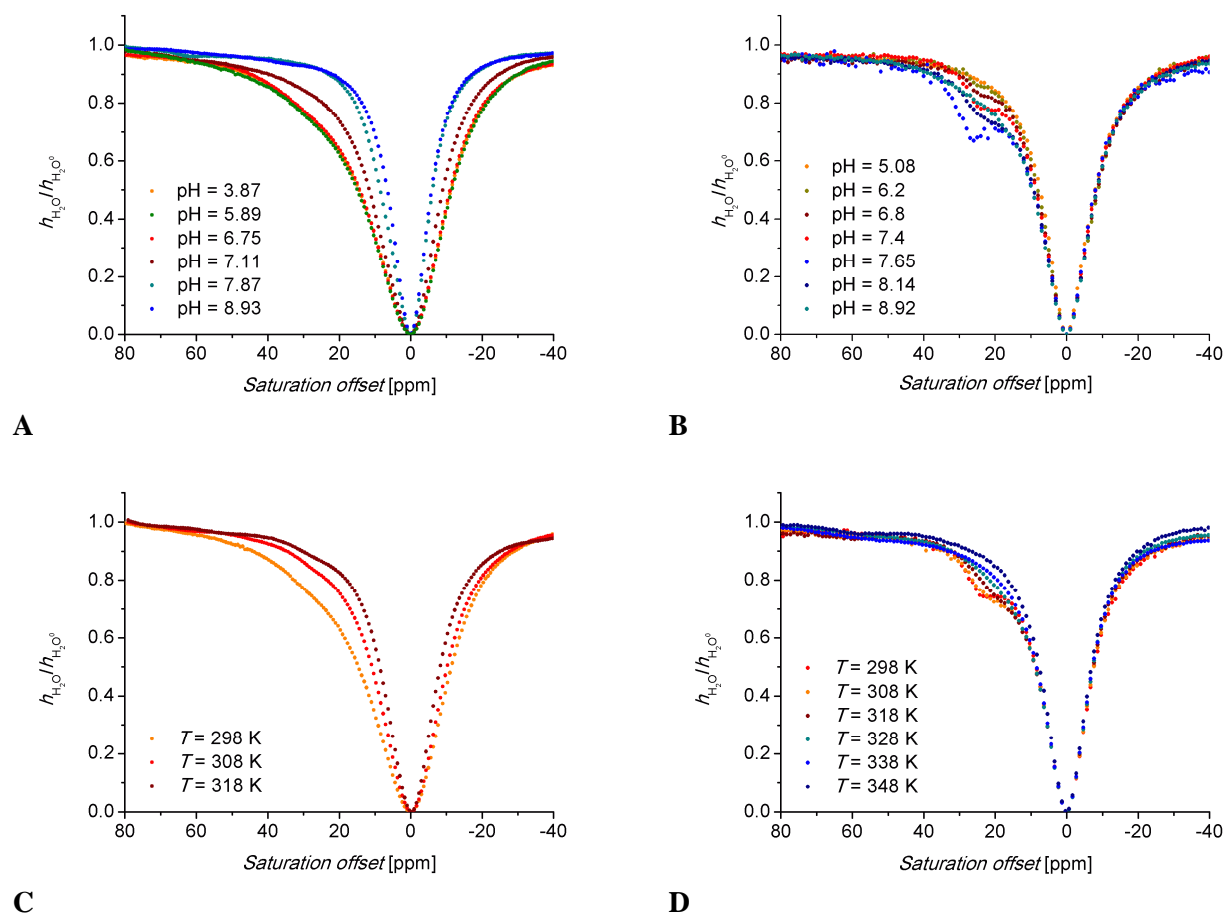

**Fig. S13 A,C:** Z-spectra of 25 mM aq. solution ( $\text{H}_2\text{O}/\text{D}_2\text{O}$  1:10) of  $[\text{Eu}(\text{H}_2\text{O})(\text{L}^3)]$  complex ( $B_0 = 7.05 \text{ T}$ , satpwr = 29 dB ( $\sim 1000 \text{ Hz}$ ), satdly = 2 s); **A:**  $T = 298 \text{ K}$ . **C:** pH = 5.40. **B,D:** Z-spectra of 50 mM aq. solutions ( $\text{H}_2\text{O}/\text{D}_2\text{O}$  1:10) of the  $[\text{Yb}(\text{L}^3)]$  complex ( $B_0 = 7.05 \text{ T}$ , satpwr = 29 dB ( $\sim 1000 \text{ Hz}$ ), satdly = 2 s); **B:**  $T = 298 \text{ K}$ , **D:** pH = 7.72.

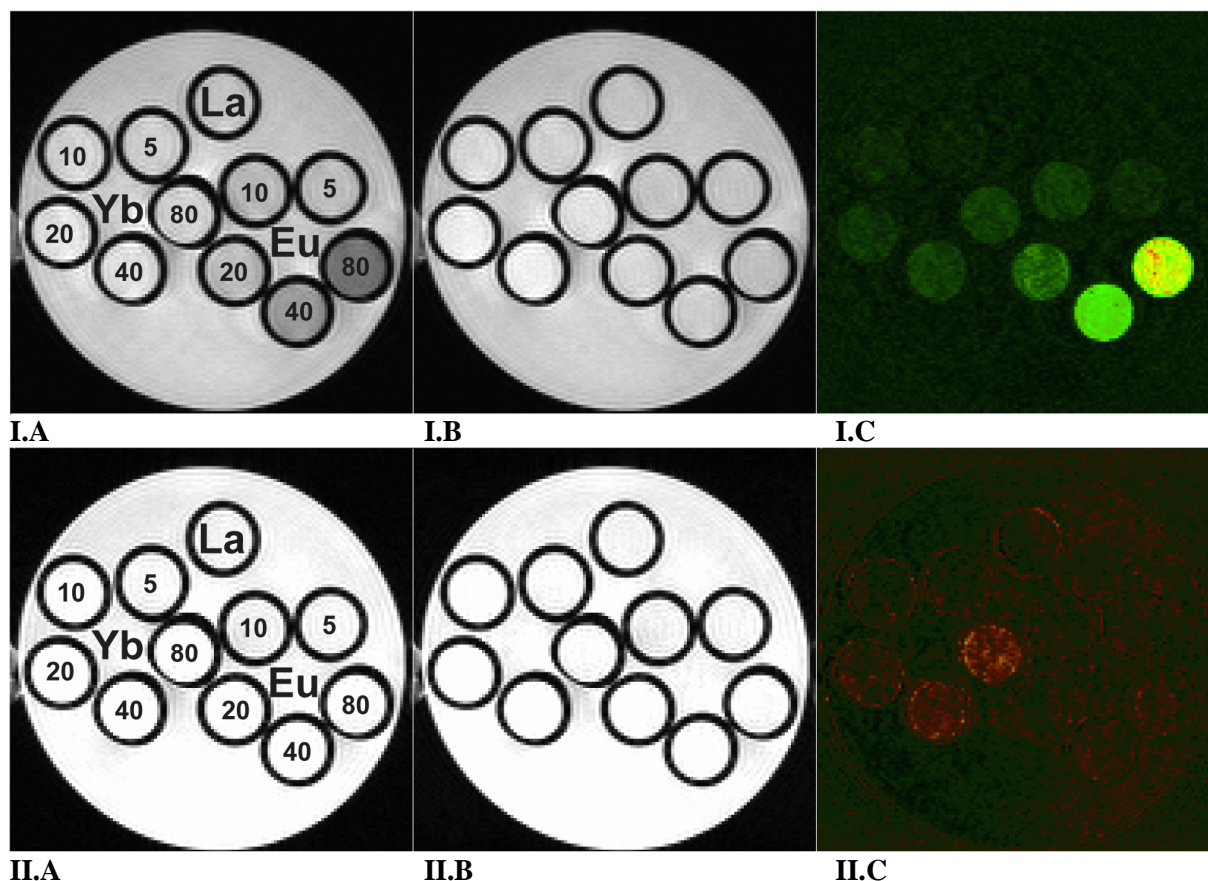

**Fig. S14** MRI-CEST images of phantom consisting of one vial containing 80 mM aq. solution of  $[\text{La}(\text{H}_2\text{O})(\text{L}^1)]$  as a standard and five vials containing aqueous solution of  $[\text{Eu}(\text{H}_2\text{O})(\text{L}^1)]$  and  $[\text{Yb}(\text{L}^1)]$  with different concentrations; pH = 7.4; concentrations (mM) are given as labels in figures A. Experimental conditions: RARE pulse sequence,  $B_0 = 4.7 \text{ T}$ ,  $B_1 = 20 \mu\text{T}$ ,  $T = 293 \text{ K}$ , satdly = 2 s, TR = 5 s, TE = 8.9 ms, scan time = 2 min. **I.A:**  $T_1$ -weighted image, satfrq = 34 ppm from the bulk water signal. **I.B:**  $T_1$ -weighted image, satfrq = -34 ppm from the bulk water signal. **I.C:** The difference between images **I.A** and **I.B** in false colours. **II.A:**  $T_1$ -weighted image, satfrq = 89 ppm from the bulk water signal. **II.B:**  $T_1$ -weighted image, satfrq = -89 ppm from the bulk water signal. **II.C:** The difference between images **II.A** and **II.B** in false colours.

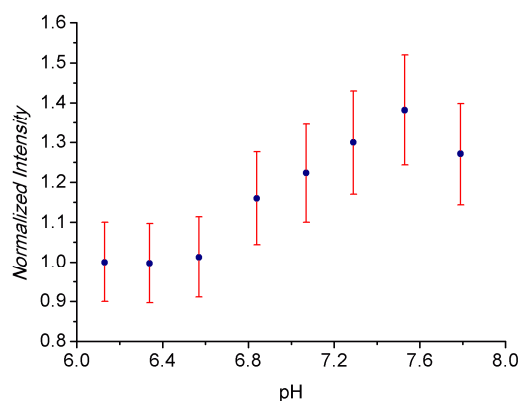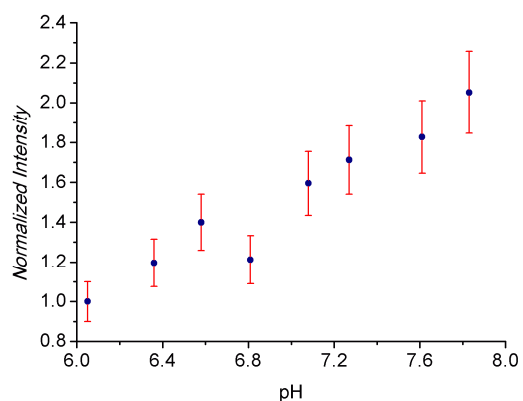

**A** **B**  
**Fig. S15** pH dependence of normalized intensity of the CEST effect (20  $\mu$ T, MRI 4.7 T). **A:**  $[\text{Eu}(\text{H}_2\text{O})(\text{L}^1)]$ , data from Fig. 5-I.C. **B:**  $[\text{Yb}(\text{L}^1)]$ , data from Fig. 5-II.C.

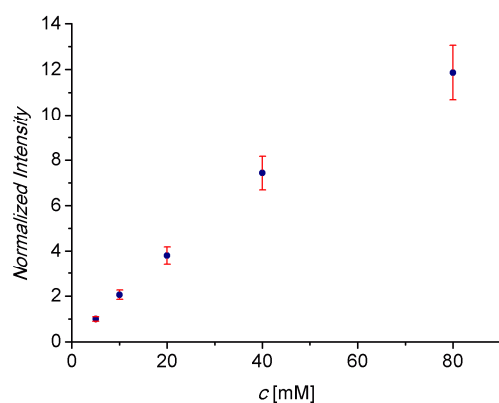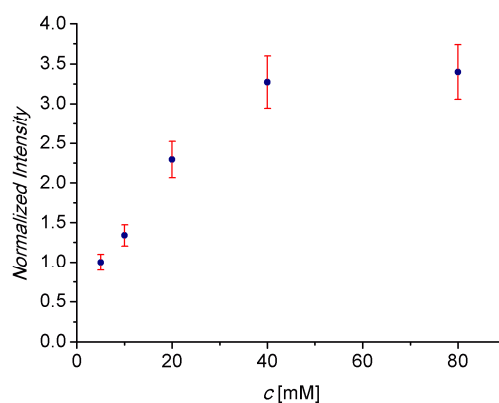

**A** **B**  
**Fig. S16** Concentration dependence of normalized intensity of the CEST effect (20  $\mu$ T, MRI 4.7 T). **A:**  $[\text{Eu}(\text{H}_2\text{O})(\text{L}^1)]$ , data from Fig S14-I.C. **B:**  $[\text{Yb}(\text{L}^1)]$ , data from Fig. S14-II.C.

# Characterization $^1\text{H}$ and $^{13}\text{C}\{^1\text{H}\}$ NMR spectra of the ligands

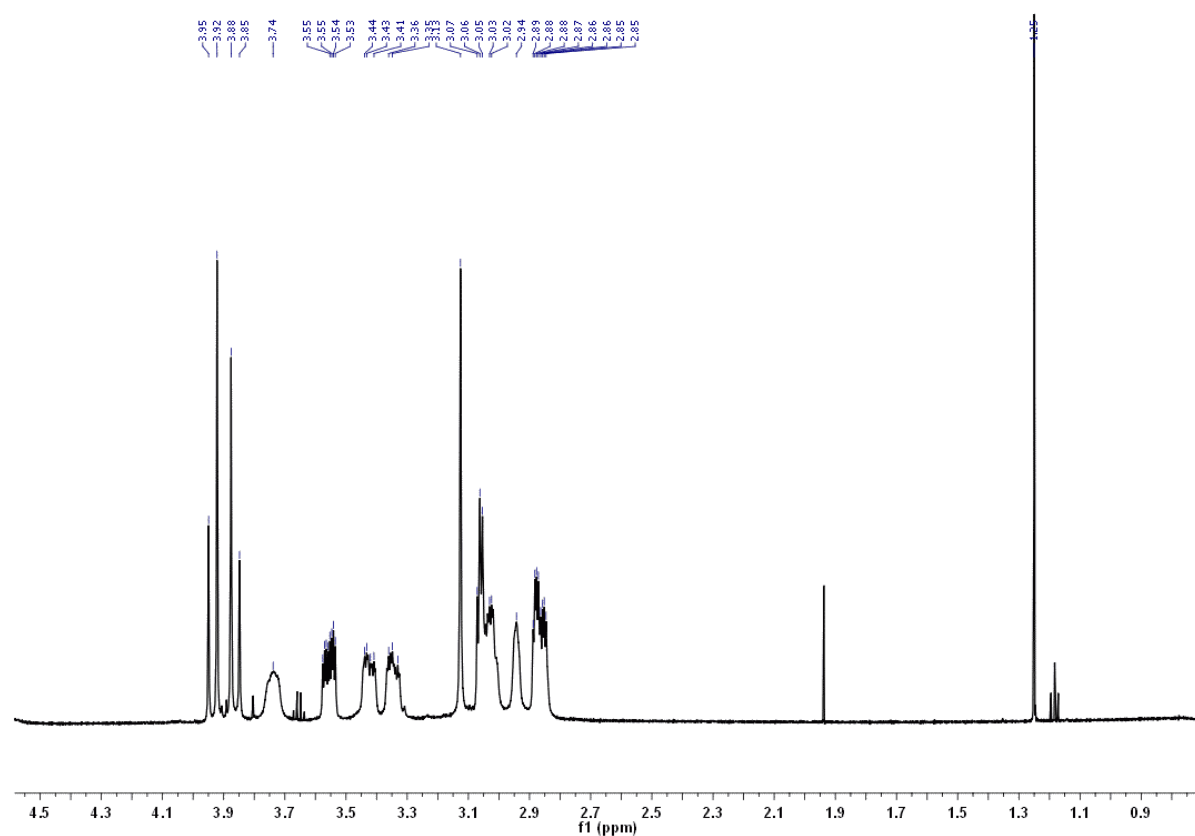

**Fig. S17**  $^1\text{H}$  NMR spectrum of  $\text{H}_3\text{L}^1$  in  $\text{D}_2\text{O}$ ,  $\text{pD} = 5.4$ .

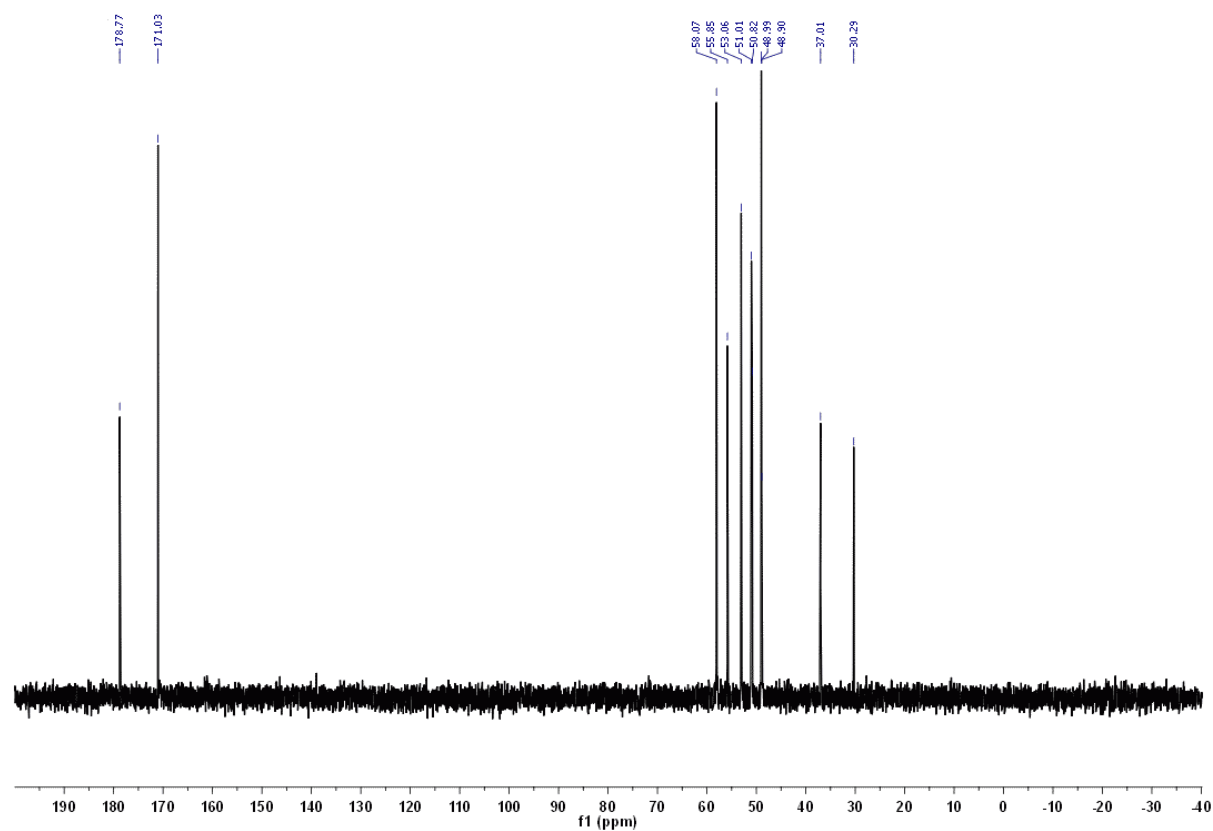

**Fig. S18**  $^{13}\text{C}\{^1\text{H}\}$  NMR spectrum of  $\text{H}_3\text{L}^1$  in  $\text{D}_2\text{O}$ ,  $\text{pD} = 5.4$ .

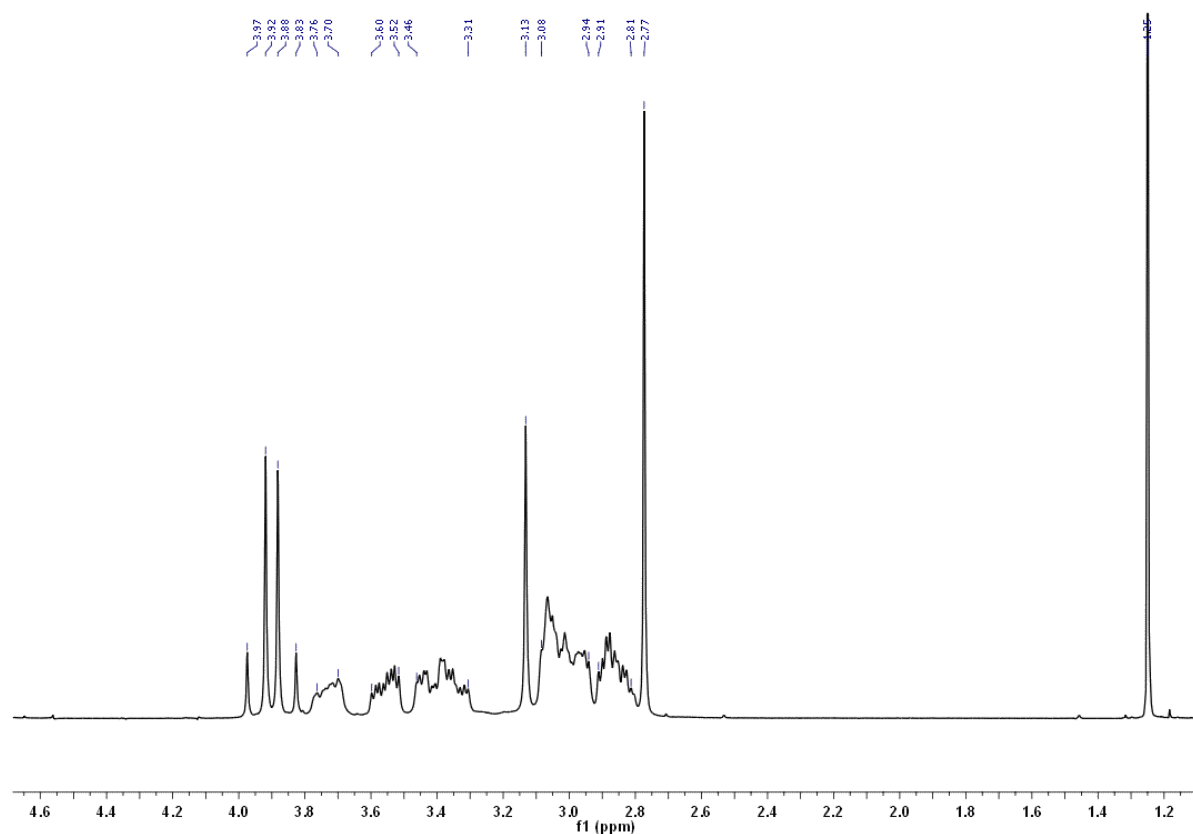

**Fig. S19**  $^1\text{H}$  NMR spectrum of  $\text{H}_3\text{L}^2$  in  $\text{D}_2\text{O}$ , pD = 5.3.

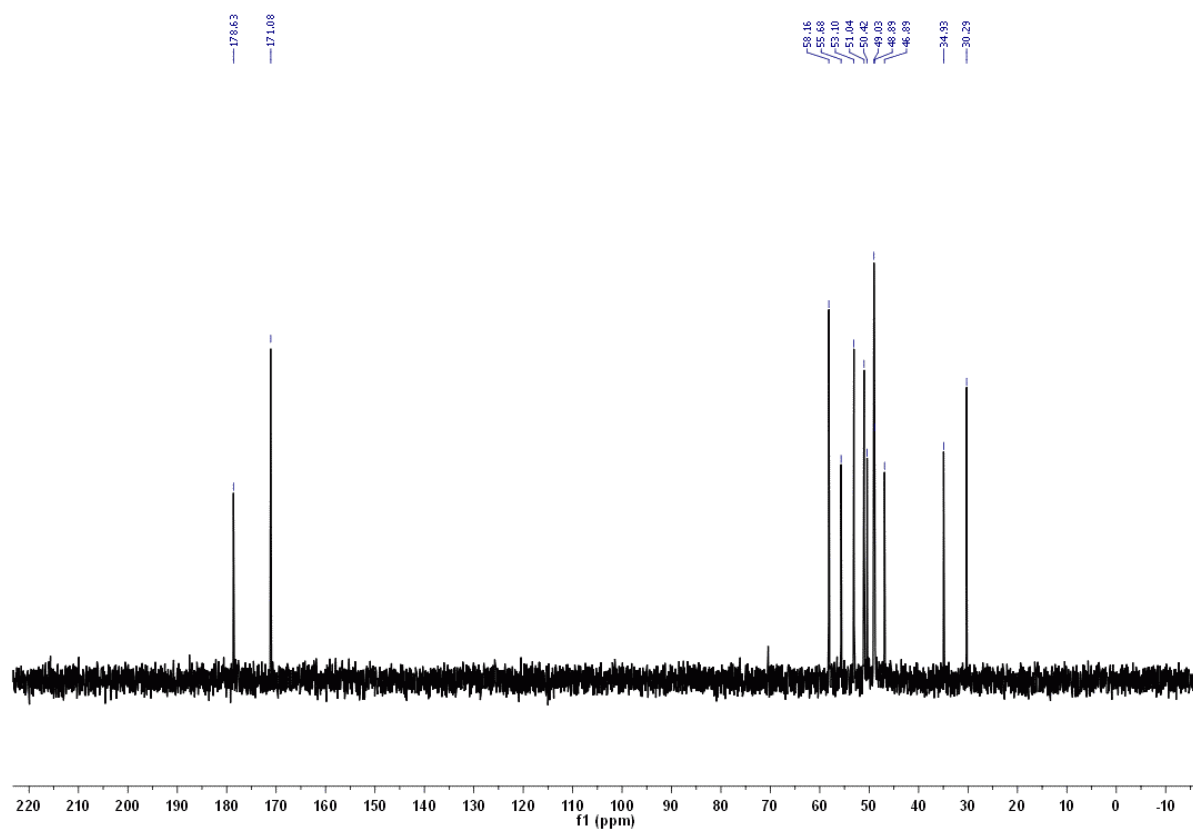

**Fig. S20**  $^{13}\text{C}$  NMR spectrum of  $\text{H}_3\text{L}^2$  in  $\text{D}_2\text{O}$ , pD = 5.6.

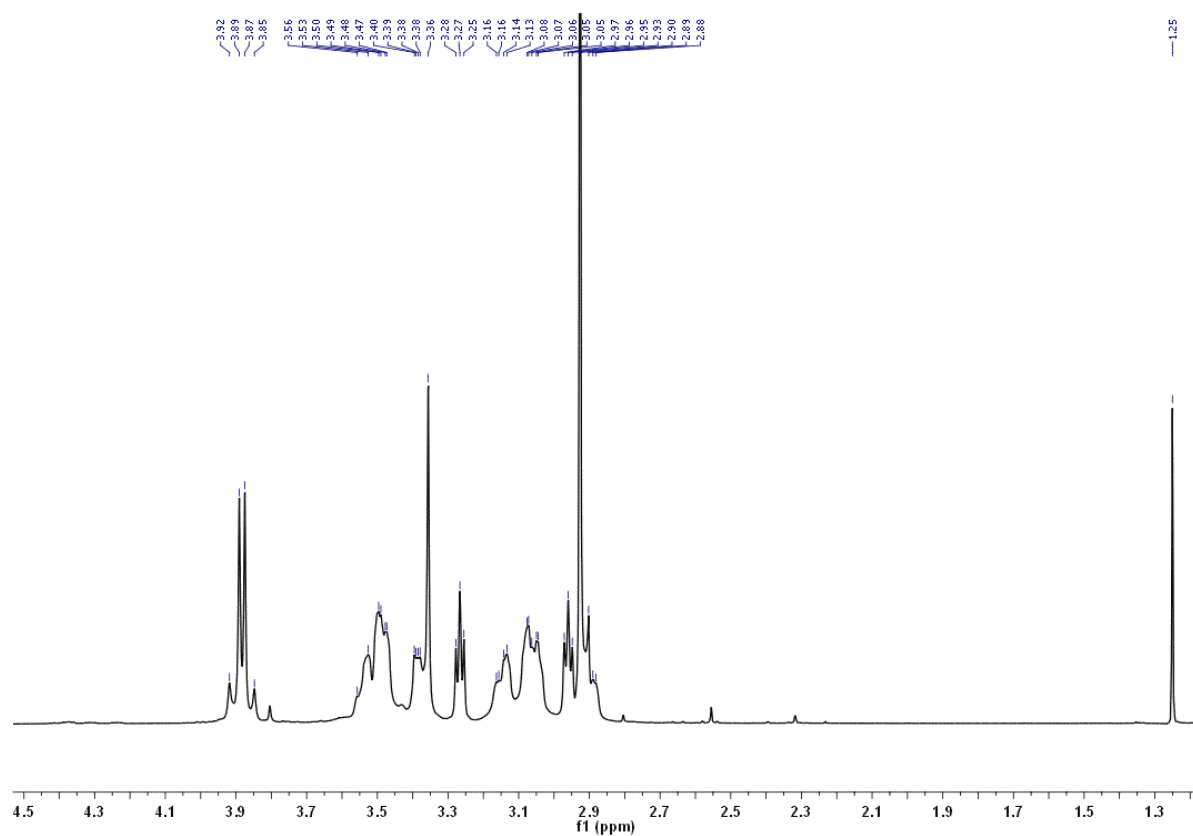

**Fig. S21**  $^1\text{H}$  NMR spectrum of  $\text{H}_3\text{L}^3$  in  $\text{D}_2\text{O}$ ,  $\text{pD} = 4.8$ .

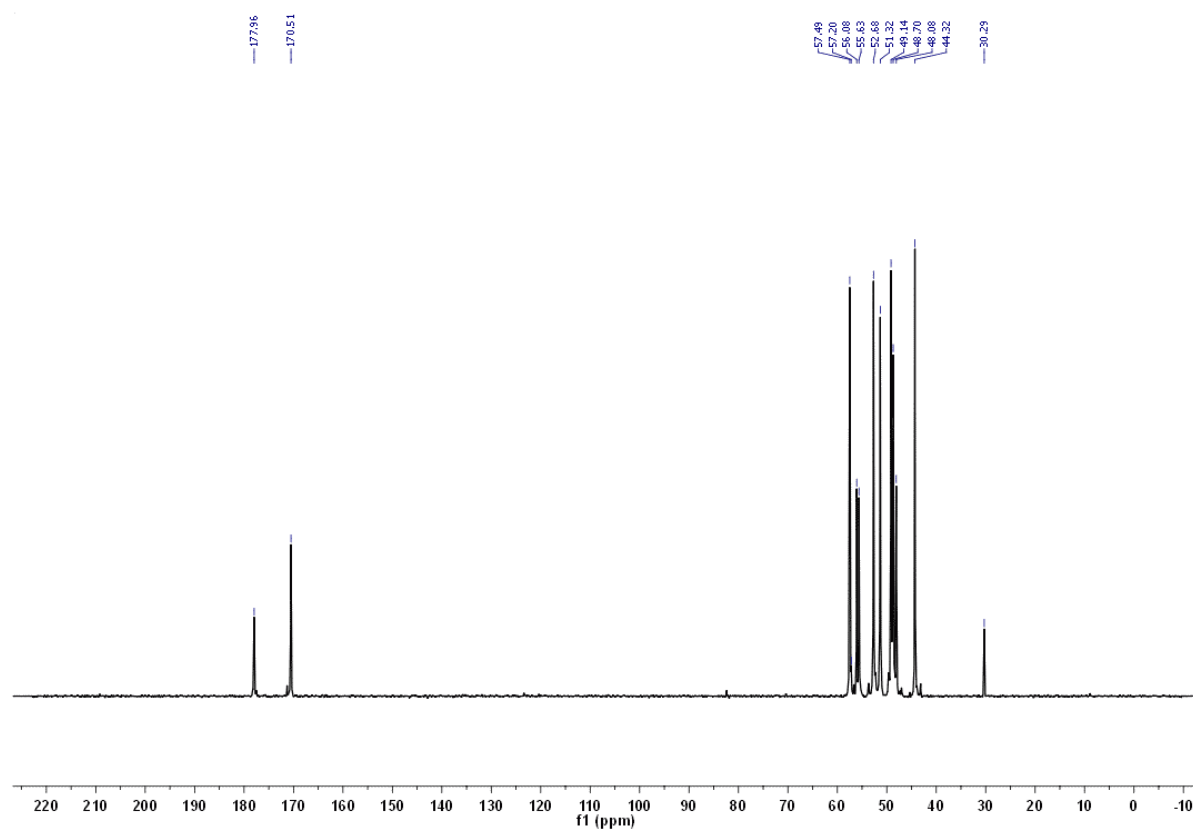

**Fig. S22**  $^{13}\text{C}\{^1\text{H}\}$  NMR spectrum of  $\text{H}_3\text{L}^3$  in  $\text{D}_2\text{O}$ ,  $\text{pD} = 4.8$ .
